# Supplementary material
Source: PubMed Central journal article supplement (PMC2291403)

E07-07-0661 Van Ijzendoorn

Supplementary figure 1. Expression levels of p27<sup>WT</sup>, p27<sup>S10D</sup> and p27<sup>S10A</sup> clones. Three clones of HepG2 cells stably expressing p27<sup>WT</sup>, p27<sup>S10D</sup> and p27<sup>S10A</sup> were lysed and subjected to SDS-PAGE and Western blot for p27 expression analysis. Bands were quantified as described in Materials and Methods and expressed as fold overexpression (p27 expression level in parental HepG2 cells set to 1).

Supplementary figure 2. Wnt signaling activity in parental and p27 Ser-10 mutant cells. Parental HepG2 cells and cells expressing p27<sup>S10A</sup> or p27<sup>S10D</sup> were transiently transfected with luciferase under the control of a promoter containing the TCF4 binding domain (TOP) or a mutated domain that no longer can bind TCF4 (FOP), and subsequently assayed for luciferase activity. Note the reduced Wnt signaling activity in p27<sup>S10A</sup> expressing cells, when compared to parental HepG2 or p27<sup>S10D</sup> expressing cells. Data are expressed as mean  $\pm$  SD of at least three independent experiments carried out in duplicate.

# Theard et al. Supplemental Figure S1

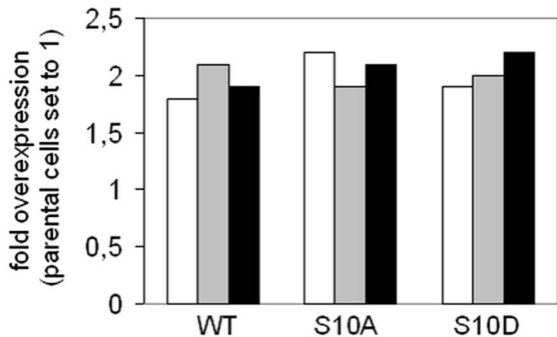

# Theard et al. Supplemental figure S2

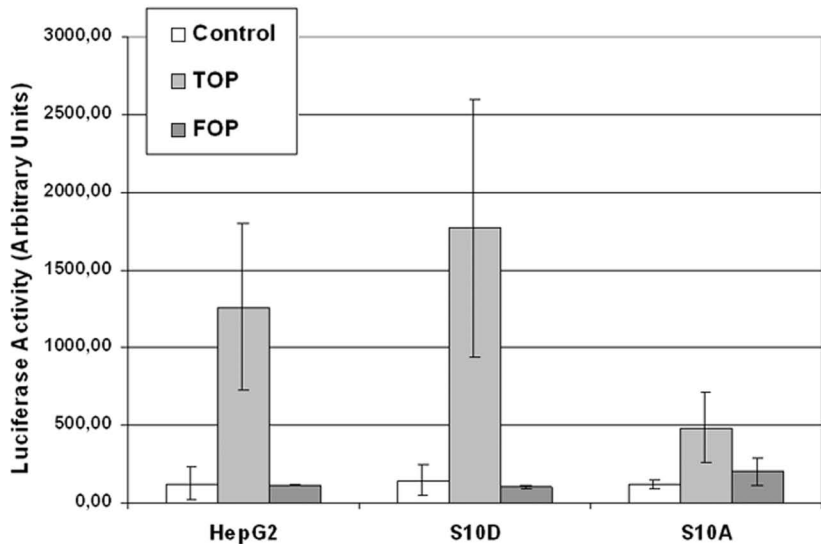

Supplement: mbc_E07-07-0661_1.pdf [file mbc_E07-07-0661_1.pdf]
